# Supplementary material for: Using enhanced-mitophagy to measure autophagic flux
Source: PubMed Central journal article supplement (PMC4358839; doi:10.1016/j.ymeth.2014.11.014), 2015-03-15

# Supplementary figure 1

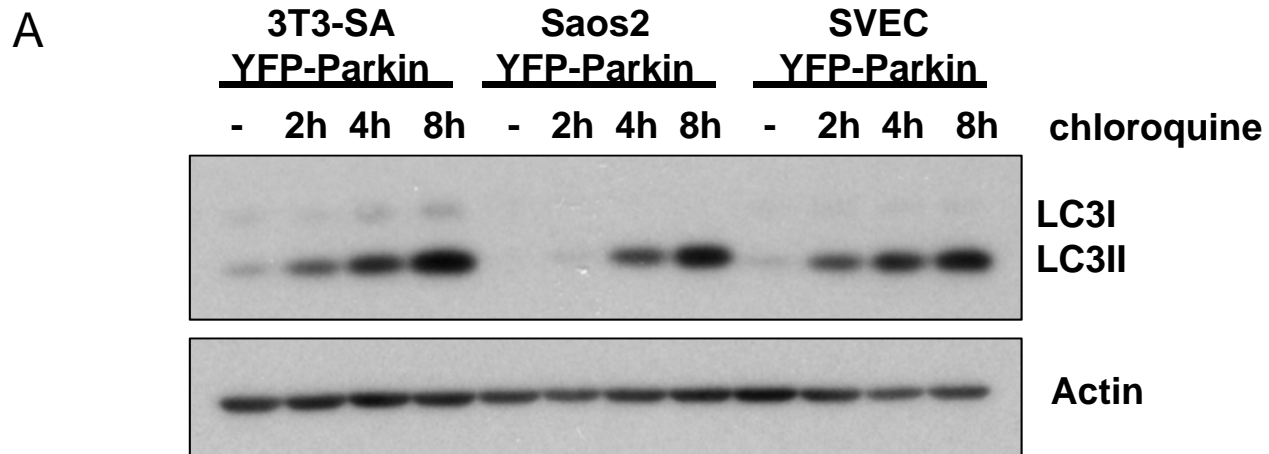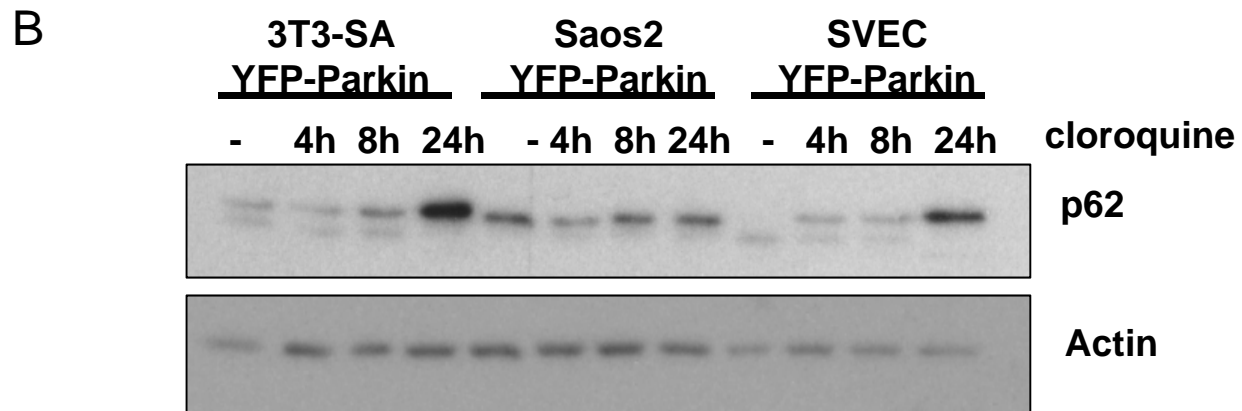

Supplement: mmc1.pdf [file mmc1.pdf]
