# Supplementary material for: Using enhanced-mitophagy to measure autophagic flux
Source: PubMed Central journal article supplement (PMC4358839; doi:10.1016/j.ymeth.2014.11.014), 2015-03-15

## Supplementary figure 2

A

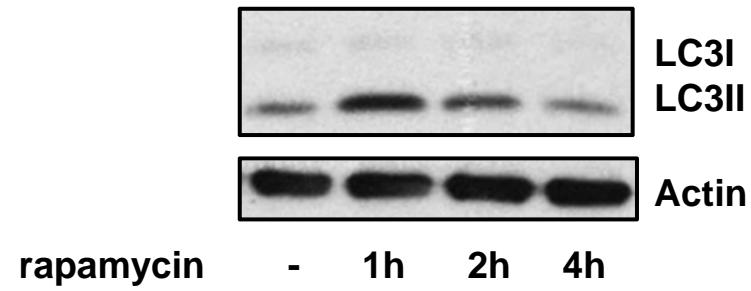

B

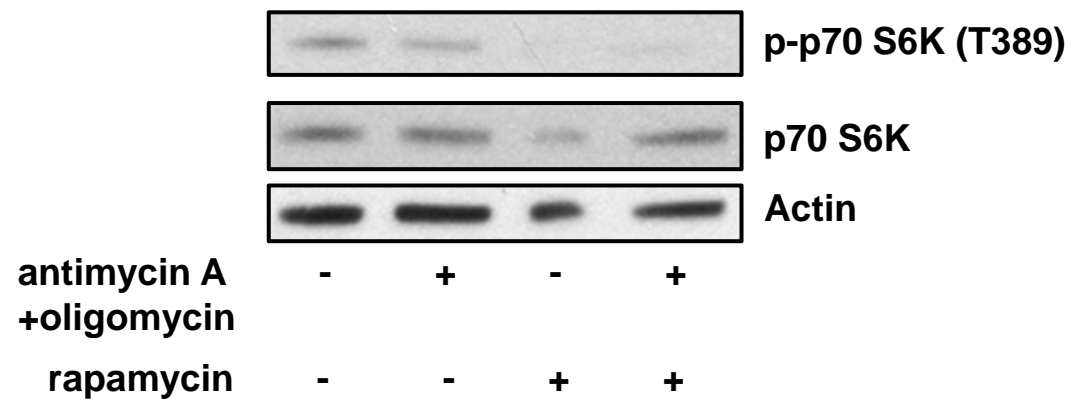

Supplement: mmc2.pdf [file mmc2.pdf]
